# Supplementary material for: Oligomeric models for estimation of polydimethylsiloxane–water partition ratios with COSMO-RS theory: impact of the combinatorial term on absolute error
Source: Royal Society of Chemistry journal article supplement (doi:10.1039/c6em00355a), 2016-09-05
Supplement: c6em00355a1.pdf [file c6em00355a1.pdf]

Supplementary Information for “Oligomeric models for estimation of polydimethylsiloxane-water partition ratios with COSMO-RS theory: Impact of the combinatorial term on absolute error” by J. Mark Parnis and Donald Mackay.

Contents:

1) The complete set of chemicals, with the published values of  $\log K(\text{PDMS-w})$ , and the abbreviated reference, corresponding to references given in the principle text.

1) The complete set of chemicals, with the published values of log  $K_{PDMS-w}$ .

|                                  |       |                               |      |
|----------------------------------|-------|-------------------------------|------|
| Kwon and Meyer 2007 Shake method |       | 1,2,3-trichlorobenzene        | 3.42 |
| terbutryn                        | 2.66  | 1,2,4-trichlorobenzene        | 3.46 |
| diuron                           | 1.10  | 1,3,5-trichlorobenzene        | 3.61 |
| carbofuran                       | 0.77  | naphthalene                   | 2.85 |
| carbaryl                         | 1.09  | acenaphthene                  | 3.46 |
| aldicarb                         | 0.35  | KWON and MEYER 2007 ABL Perm  |      |
| aniline                          | 0.01  | 1,2,3-trichlorobenzene        | 3.46 |
| 2-chloroaniline                  | 1.04  | 1,2,4-trichlorobenzene        | 3.51 |
| 3-chloroaniline                  | 0.83  | 1,3,5-trichlorobenzene        | 3.67 |
| 3,4-dimethylaniline              | 1.07  | 2,4,5-trichlorotoluene        | 4.21 |
| 2,4-dichloroaniline              | 1.69  | 1,2,3,5-tetrachlorobenzene    | 4.12 |
| 3,4-dichloroaniline              | 1.39  | 1,2,4,5-tetrachlorobenzene    | 4.03 |
| 2,3,5,6-tetrachloroaniline       | 3.25  | pentachlorobenzene            | 4.56 |
| phenol                           | -0.53 | hexachlorobenzene             | 4.91 |
| 2-chlorophenol                   | 0.56  | phenanthrene                  | 3.87 |
| 4,6-dinitro-o-toluene            | 1.23  | anthracene                    | 3.98 |
| 2,4,6-trichlorophenol            | 1.73  | fluoranthene                  | 4.32 |
| pentachlorophenol                | 2.65  | pyrene                        | 4.36 |
| 1,2-dichlorobenzene              | 2.92  | chrysene                      | 4.74 |
| 1,4-dichlorobenzene              | 2.91  | benz[a]anthracene             | 4.85 |
| 1,2,3-trichlorobenzene           | 3.33  | benzo[a]pyrene                | 5.09 |
| 1,2,4-trichlorobenzene           | 3.33  | perylene                      | 4.98 |
| 1,3,5-trichlorobenzene           | 3.36  | dibenz[a,c]anthracene         | 5.41 |
| naphthalene                      | 2.75  | dibenz[a,h]anthracene         | 5.47 |
| acenaphthene                     | 3.46  | KWON and MEYER 2007 Lit. avg. |      |
| Kwon and Meyer 2007 PCDM method  |       | benzo[ghi]perylene            | 5.36 |
| 2,4,5-trichlorotoluene           | 4.12  | pentachlorobenzene            | 4.10 |
| 1,2,3,5-tetrachlorobenzene       | 4.24  | hexachlorobenzene             | 4.54 |
| 1,2,4,5-tetrachlorobenzene       | 4.14  | naphthalene                   | 3.00 |
| pentachlorobenzene               | 4.69  | acenaphthene                  | 3.63 |
| hexachlorobenzene                | 5.12  | phenanthrene                  | 3.70 |
| phenanthrene                     | 3.74  | anthracene                    | 3.75 |
| anthracene                       | 3.93  | fluoranthene                  | 4.22 |
| fluoranthene                     | 4.21  | pyrene                        | 4.33 |
| pyrene                           | 4.27  | chrysene                      | 4.83 |
| chrysene                         | 4.81  | benz[a]anthracene             | 4.55 |
| benz[a]anthracene                | 4.90  | benzo[a]pyrene                | 4.81 |
| benzo[a]pyrene                   | 5.36  | dibenz[a,h]anthracene         | 4.86 |
| 1,2-dichlorobenzene              | 2.81  | benzo[ghi]perylene            | 4.84 |
| 1,4-dichlorobenzene              | 2.95  |                               |      |

| Hsieh 2011 |      | CHAO 2014               |       |
|------------|------|-------------------------|-------|
| PCB18      | 4.91 | PCB203                  | 7.09  |
| PCB16      | 5.12 | PCB195                  | 6.89  |
| PCB32      | 5.12 | PCB194                  | 6.79  |
| PCB28,31   | 5.17 | Benzyl alcohol          | -0.35 |
| PCB33,53   | 5.18 | 4-Fluorophenol          | -0.28 |
| PCB22      | 5.30 | m-Cresol                | -0.03 |
| PCB52      | 5.48 | Phenethyl alcohol       | 0.12  |
| PCB47,48   | 5.49 | 3-Methylbenzyl alcohol  | 0.17  |
| PCB44      | 5.44 | 3-Chlorophenol          | 0.31  |
| PCB71      | 5.49 | 3,5-Dimethylphenol      | 0.42  |
| PCB41      | 5.49 | 3-Bromophenol           | 0.46  |
| PCB70      | 5.79 | 4-Ethylphenol           | 0.60  |
| PCB66      | 5.70 | 4-Chloroaniline         | 0.84  |
| PCB95      | 5.77 | Phenyl acetate          | 0.86  |
| PCB56,60   | 5.86 | Benzonitrile            | 1.04  |
| PCB101     | 6.01 | Acetophenone            | 1.04  |
| PCB99      | 6.17 | 4-Chloroacetophenone    | 1.64  |
| PCB83      | 6.02 | Methyl benzoate         | 1.65  |
| PCB97      | 6.05 | Benzene                 | 1.76  |
| PCB87      | 6.19 | Ethylbenzoate           | 2.12  |
| PCB85      | 6.38 | Toluene                 | 2.28  |
| PCB110     | 6.03 | 4-Chloroanisole         | 2.37  |
| PCB151     | 6.31 | Chlorobenzene           | 2.40  |
| PCB135     | 6.48 | Bromobenzene            | 2.51  |
| PCB149     | 6.42 | o-Xylene                | 2.69  |
| PCB118     | 6.23 | m-Xylene                | 2.73  |
| PCB146     | 6.66 | Iodobenzene             | 2.73  |
| PCB153     | 6.62 | p-Xylene                | 2.75  |
| PCB105,132 | 6.40 | Ethylbenzene            | 2.75  |
| PCB179     | 6.73 | Phenol                  | -0.18 |
| PCB141     | 6.73 | Naphthalene             | 2.83  |
| PCB138     | 6.61 | Cyclopentane            | 2.85  |
| PCB163     | 6.56 | 4-Chlorotoluene         | 2.87  |
| PCB158     | 6.83 | Methylcyclopentane      | 3.13  |
| PCB187     | 6.96 | Propylbenzene           | 3.14  |
| PCB182     | 6.96 | Isopropylbenzene        | 3.15  |
| PCB183     | 6.26 | 1,3,5-Trimethylbenzene  | 3.16  |
| PCB128     | 6.61 | 1-Methyl-4-Ethylbenzene | 3.20  |
| PCB185     | 6.86 | Cyclohexane             | 3.20  |
| PCB174     | 7.04 | 1-Methylnaphthalene     | 3.26  |
| PCB177     | 7.02 | 1,2,4-Trimethylbenzene  | 3.34  |
| PCB171,202 | 6.78 | tert-Butylbenzene       | 3.34  |
| PCB180     | 6.89 | Biphenyl                | 3.37  |
| PCB170     | 6.82 | 2,3-Dimethylbutane      | 3.37  |
| PCB201     | 7.06 | 2-Methylpentane         | 3.51  |

| CHAO 2014                             |      | Kang et al. 2016 shake                                      |      |
|---------------------------------------|------|-------------------------------------------------------------|------|
| 3-Methylpentane                       | 3.51 | 3,3-Dimethyloctane                                          | 4.92 |
| 1-Methyl-3-Isopropylbenzene           | 3.52 | 2,5-Dimethylheptane                                         | 4.93 |
| trans-1,2-Dimethylcyclopentane        | 3.53 | 3,4-Dimethylheptane                                         | 4.97 |
| 1-Methyl-3-n-Propylbenzene            | 3.58 | 1,4,5-Trimethylnaphthalene                                  | 3.74 |
| n-Butylbenzene                        | 3.59 | 2,4,5-Trimethylnaphthalene                                  | 3.72 |
| 1,2-Dimethyl-4-Ethylbenzene           | 3.60 | 9,9-Dimethylfluorene                                        | 3.76 |
| sec-Butylbenzene                      | 3.60 | 9-Methylanthracene                                          | 4.24 |
| Isobutylbenzene                       | 3.62 | Kang et al. 2016 ABL perm                                   |      |
| cis-1,3-Dimethylcyclopentane          | 3.63 | 1,4,5-Trimethylnaphthalene                                  | 3.74 |
| 1,3-Dimethyl-2-Ethylbenzene           | 3.64 | 2,4,5-Trimethylnaphthalene                                  | 3.72 |
| Methylcyclohexane                     | 3.67 | 9,9-Dimethylfluorene                                        | 3.76 |
| 1,2,4-Trimethylcyclopentane(1a,2a,4a) | 3.75 | 9-Methylanthracene                                          | 5.52 |
| trans-1,2-Dimethylcyclohexane         | 3.82 | 3-Methylphenanthrene                                        | 4.16 |
| 1-Ethyl-1-methylcyclopentane          | 3.83 | 3,6-Dimethylphenanthrene                                    | 4.64 |
| 2,2-Dimethylpentane                   | 3.87 | 9,10-Dimethylanthracene                                     | 4.52 |
| cis-1,2-Dimethylcyclohexane           | 3.89 | Grant 2016                                                  |      |
| n-Pentylbenzene                       | 3.91 | log K pdms-w                                                | 4.53 |
| 2,4-Dimethylpentane                   | 3.95 | 7-Methylbenz[a]anthracene                                   | 4.99 |
| 2-Methylbutylbenzene                  | 3.96 | 7,12-Dimethylbenz[a]anthracene                              | 5.32 |
| 2,2,3-Trimethylbutane                 | 3.99 | 123478-HxCDD                                                | 6.42 |
| 2-Methylhexane                        | 4.01 | 1234678-HpCDD                                               | 6.68 |
| 3,3-Dimethylpentane                   | 4.04 | OCDD                                                        | 7.25 |
| 3-Methylhexane                        | 4.05 | OCDF                                                        | 7.44 |
| 2,3-Dimethylpentane                   | 4.12 | PCB182                                                      | 6.63 |
| 1,2,4-Triethylbenzene                 | 4.21 | Eganhouse 2016 averaged                                     |      |
| 1,3,5-Triethylbenzene                 | 4.27 | PCB204                                                      | 6.88 |
| 2,2,3-Trimethylpentane                | 4.33 | PCB206                                                      | 7.45 |
| 2,5-Dimethylhexane                    | 4.37 | PCB209                                                      | 7.59 |
| 2,2-Dimethylhexane                    | 4.39 | Bis(p-chlorophenyl)ethane                                   | 5.55 |
| 2-Methylheptane                       | 4.41 | DDNU (VAN)                                                  | 5.84 |
| 4-Methylheptane                       | 4.44 | DDMU                                                        | 5.97 |
| 3-Ethylhexane                         | 4.45 | 1-Chloro-2-[2,2-dichloro-1-(4-chlorophenyl)vinyl]benzene    | 6.35 |
| 3-Methylheptane                       | 4.50 | 1,1'-(2-Chloro-1,1-ethanediyl)bis(4-chlorobenzene)          | 5.14 |
| 2,3-Dimethylhexane                    | 4.53 | dichlorodiphenyldichloroethylene                            | 6.37 |
| 2,4-Dimethylhexane                    | 4.61 | Mitotane                                                    | 5.44 |
| 2-Methyloctane                        | 4.66 | Dichlorodiphenyldichloroethane                              | 5.27 |
| 3,3-Diethylpentane                    | 4.80 | 1-Chloro-2-[2,2,2-trichloro-1-(4-chlorophenyl)ethyl]benzene | 6.48 |
| 3-Methyloctane                        | 4.82 | DDT                                                         | 6.18 |
| 2,3-Dimethylheptane                   | 4.84 | PCB49                                                       | 6.08 |
| 3,3-Dimethylheptane                   | 4.88 | PCB28                                                       | 5.72 |
| 3,5-Dimethylheptane                   | 4.90 | PCB52                                                       | 6.01 |
|                                       |      | PCB44                                                       | 5.96 |
|                                       |      | PCB70                                                       | 6.12 |
|                                       |      | PCB66                                                       | 6.13 |
|                                       |      | PCB101                                                      | 6.52 |
|                                       |      | PCB87                                                       | 6.51 |
|                                       |      | PCB110                                                      | 6.46 |
|                                       |      | PCB118                                                      | 6.59 |
|                                       |      | PCB153                                                      | 6.98 |
|                                       |      | PCB138                                                      | 6.98 |
